# Supplementary material
Source: Springer Nature journal article supplement (https://www.springermedizin.de/resource/supplementary/13034_2008_63_MOESM6_ESM.pdf/9652316)
Supplement: MOESM6 [file 9652316]

# DPICS

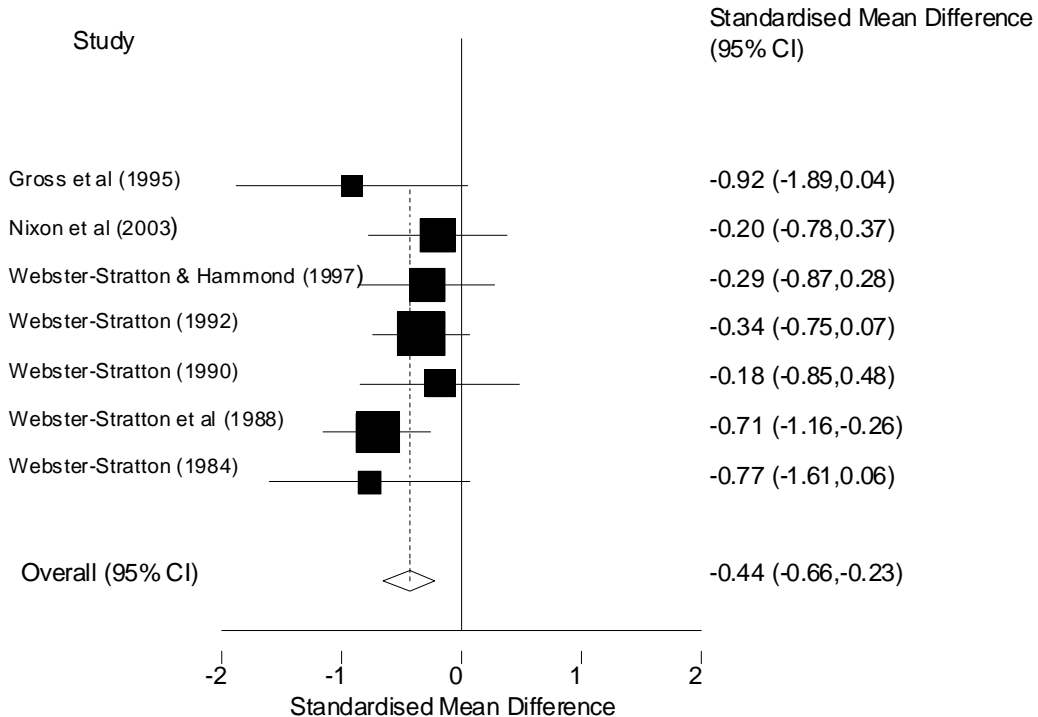

Heterogeneity chi-squared = 4.65 (d.f. = 6) p = 0.589

Estimate of between-study variance Tau-squared = 0.0000

Test of SMD=0 : z= 4.04 p = 0.000
